# Supplementary material for: Abnormal Prefrontal Functional Connectivity Is Associated with Inflexible Information Processing in Patients with Autism Spectrum Disorder (ASD): An fNIRS Study
Source: MDPI journal article supplement (doi:10.3390/biomedicines10051132), 2022-05-13
Supplement: s1 [file s1]

## **Supplementary Tables**

**Table S1:** The MNI coordinates and anatomical labels of each NIRS channel

**Table S2:** Correlation table showing the relationship between age, reaction time measures and fNIRS functional connectivity measures

**Table S3:** Correlation tables between WCST reaction time and PFC FC parameters (subgroup analyses)

**Table S1:** The MNI coordinates and anatomical labels of each NIRS channel

| Channel number | x      | y       | z      | Anatomical labels (listed by descending % of overlap)      |
|----------------|--------|---------|--------|------------------------------------------------------------|
| CH01           | -75.1  | -38.7   | 114.7  | SupraMarginal_R                                            |
| CH02           | -71.15 | -62.05  | 101.1  | Postcentral_R, Precentral_R                                |
| CH03           | -60.1  | -83.5   | 90.9   | Frontal_Inf_Tri_R, Frontal_Inf_Oper_R, Frontal_Mid_R       |
| CH04           | -41.55 | -100.75 | 84.65  | Frontal_Mid_R                                              |
| CH05           | -17.55 | -109.8  | 81.3   | Frontal_Sup_R, Frontal_Mid_R, Frontal_Sup_Medial_R         |
| CH06           | 10.4   | -109.95 | 80.45  | Frontal_Sup_L, Frontal_Sup_Medial_L                        |
| CH07           | 40.7   | -98.85  | 83.3   | Frontal_Mid_L                                              |
| CH08           | 62.35  | -80.2   | 89.3   | Frontal_Inf_Tri_L, Frontal_Inf_Oper_L                      |
| CH09           | 75.4   | -58.7   | 96.4   | Postcentral_L, Precentral_L                                |
| CH10           | 81.5   | -34.45  | 105.8  | SupraMarginal_L                                            |
| CH11           | -78.75 | -22.3   | 108.85 | SupraMarginal_R                                            |
| CH12           | -79.5  | -46.9   | 92.55  | Postcentral_R, SupraMarginal_R                             |
| CH13           | -71.5  | -70.45  | 80.6   | Precentral_R, Frontal_Inf_Oper_R, Frontal_Inf_Tri_R        |
| CH14           | -58.35 | -92.5   | 71.4   | Frontal_Inf_Tri_R, Frontal_Mid_R                           |
| CH15           | -33.55 | -107.9  | 65.95  | Frontal_Mid_R, Frontal_Sup_R                               |
| CH16           | -4.95  | -112.05 | 63.95  | Frontal_Sup_Medial_R, Frontal_Sup_Medial_L                 |
| CH17           | 27.2   | -107.85 | 64.95  | Frontal_Sup_L, Frontal_Mid_L                               |
| CH18           | 55.2   | -90     | 69.25  | Frontal_Inf_Tri_L, Frontal_Mid_L                           |
| CH19           | 70.1   | -67.7   | 76.05  | Frontal_Inf_Oper_L, Frontal_Inf_Tri_L                      |
| CH20           | 81.3   | -43.2   | 84.65  | Postcentral_L                                              |
| CH21           | 82.9   | -18.75  | 97.3   | Temporal_Sup_L, SupraMarginal_L                            |
| CH22           | -83.15 | -30.5   | 86.7   | Temporal_Sup_R, SupraMarginal_R                            |
| CH23           | -79.85 | -55.3   | 72.05  | Postcentral_R, Rolandic_Oper_R, Precentral_R               |
| CH24           | -69.75 | -79.45  | 61.1   | Frontal_Inf_Tri_R                                          |
| CH25           | -50.35 | -99.65  | 52.7   | Frontal_Mid_R                                              |
| CH26           | -20.95 | -110.15 | 48.6   | Frontal_Sup_R, Frontal_Sup_Medial_R                        |
| CH27           | 11.85  | -109.95 | 48.45  | Frontal_Sup_L, Frontal_Sup_Medial_L                        |
| CH28           | 41.7   | -99     | 50.9   | Frontal_Mid_L                                              |
| CH29           | 62.95  | -77.5   | 56     | Frontal_Inf_Tri_L                                          |
| CH30           | 76     | -52.2   | 64.3   | Rolandic_Oper_L, Frontal_Inf_Oper_L, Postcentral_L         |
| CH31           | 82.7   | -27.5   | 76.15  | Temporal_Mid_L, Temporal_Sup_L, SupraMarginal_L            |
| CH32           | -82.9  | -13.6   | 79.15  | Temporal_Sup_R, Temporal_Mid_R                             |
| CH33           | -81.95 | -38.5   | 63.85  | Temporal_Sup_R                                             |
| CH34           | -74.35 | -64.2   | 51.75  | Frontal_Inf_Oper_R, Frontal_Inf_Tri_R, Rolandic_Oper_R     |
| CH35           | -62.05 | -87.9   | 41.05  | Frontal_Inf_Tri_R, Frontal_Inf_Orb_R                       |
| CH36           | -37.55 | -105.05 | 33.75  | Frontal_Mid_Orb_R, Frontal_Mid_R, Frontal_Sup_Orb_R        |
| CH37           | -5.55  | -108.55 | 31.6   | Frontal_Mid_Orb_R, Frontal_Mid_Orb_L, Frontal_Sup_Medial_R |
| CH38           | 27.25  | -105.35 | 32.95  | Frontal_Mid_Orb_L, Frontal_Sup_L, Frontal_Sup_Orb_L        |
| CH39           | 54.15  | -86.9   | 36.95  | Frontal_Inf_Orb_L, Frontal_Inf_Tri_L, Frontal_Mid_Orb_L    |
| CH40           | 68.7   | -60.65  | 44.85  | Temporal_Pole_Sup_L, Frontal_Inf_Tri_L                     |
| CH41           | 79.55  | -37     | 54.2   | Temporal_Mid_L                                             |
| CH42           | 84.4   | -10.9   | 66.75  | Temporal_Mid_L                                             |

|      |        |         |       |                                      |
|------|--------|---------|-------|--------------------------------------|
| CH43 | -81.7  | -21.6   | 56.3  | Temporal_Mid_R, Temporal_Sup_R       |
| CH44 | -76.45 | -47.4   | 43.55 | Temporal_Sup_R, Temporal_Mid_R       |
| CH45 | -66.65 | -72.65  | 31.7  | Frontal_Inf_Orb_R, Frontal_Inf_Tri_R |
| CH46 | -49.25 | -93.3   | 22.1  | Frontal_Mid_Orb_R, Frontal_Inf_Orb_R |
| CH47 | -22.15 | -103.45 | 16.75 | Frontal_Sup_Orb_R, Frontal_Mid_Orb_R |
| CH48 | 9.85   | -103.95 | 16.1  | Frontal_Sup_Orb_L, Frontal_Mid_Orb_L |
| CH49 | 39.7   | -93.25  | 19    | Frontal_Mid_Orb_L, Frontal_Inf_Orb_L |
| CH50 | 59.9   | -70.05  | 25.8  | Frontal_Inf_Orb_L                    |
| CH51 | 72.25  | -45.45  | 34.75 | Temporal_Mid_L                       |
| CH52 | 81.25  | -20.4   | 44.8  | Temporal_Mid_L, Temporal_Inf_L       |

**Table S2:** Correlation table showing the relationship between age, reaction time measures and fNIRS functional connectivity measures

| Group/<br>Parameters | RT_acquisition | RT_application | R_IPFC_acquisition | R_IPFC_application | L_IPFC_application |
|----------------------|----------------|----------------|--------------------|--------------------|--------------------|
| Whole group          | -0.053         | 0.046          | 0.181              | 0.159              | 0.171              |
| TD subgroup          | -0.173         | -0.086         | 0.189              | 0.066              | -0.005             |
| ASD subgroup         | 0.239          | 0.415          | 0.139              | 0.194              | 0.095              |

Note: N = 51 (listwise); Spearman's rho correlation analyses were performed.

**Table S3:** Correlation tables between WCST reaction time and PFC FC parameters (subgroup analyses)

a) TD subgroup

|                       | <b>R_IPFC_acquisition</b> | <b>R_IPFC_application</b> | <b>L_IPFC_application</b> |
|-----------------------|---------------------------|---------------------------|---------------------------|
| <b>RT_acquisition</b> | -0.397                    | -0.456                    | -0.443                    |
| <b>RT_application</b> | -0.406                    | -0.529 **                 | -0.461                    |

Note: N = 24 (listwise); Spearman's rho correlation analyses were performed.

b) ASD subgroup

|                       | <b>R_IPFC_acquisition</b> | <b>R_IPFC_application</b> | <b>L_IPFC_application</b> |
|-----------------------|---------------------------|---------------------------|---------------------------|
| <b>RT_acquisition</b> | 0.022                     | 0.062                     | 0.155                     |
| <b>RT_application</b> | 0.041                     | -0.018                    | -0.119                    |

Note: N = 27 (listwise); Spearman's rho correlation analyses were performed.
